# Supplementary material
Source: MDPI journal article supplement (https://www.mdpi.com/1999-4907/14/1/165)
Supplement: s1 [file s1]

**Table S1.** List of all variables recorded automatically in the JDLink server for harvesters and forwarders.

| No. | Variable                                                    | Unit              | Harvester | Forwarder |
|-----|-------------------------------------------------------------|-------------------|-----------|-----------|
| 1.  | Used fuel                                                   | l                 | x         | x         |
| 2.  | TimberMatic version                                         | -                 | x         | x         |
| 3.  | Fuel level                                                  | %                 | x         | x         |
| 4.  | Harvested volume – fuelwood                                 | m <sup>3</sup>    | x         | -         |
| 5.  | Harvested volume – multi-tree-handling                      | m <sup>3</sup>    | x         | -         |
| 6.  | Harvested volume – standard                                 | m <sup>3</sup>    | x         | -         |
| 7.  | Driving distance – high gear                                | km                | x         | x         |
| 8.  | Driving distance – low gear                                 | km                | x         | x         |
| 9.  | Average fuel use per harvested volume - standard            | l/m <sup>3</sup>  | x         | -         |
| 10. | Average fuel use per harvested volume – multi-tree-handling | l/m <sup>3</sup>  | x         | -         |
| 11. | Average fuel use per harvested volume - fuelwood            | l/m <sup>3</sup>  | x         | -         |
| 12. | Engine utilization – key-off                                | h                 | x         | x         |
| 13. | Engine utilization – idle                                   | h                 | x         | x         |
| 14. | Engine utilization – low                                    | h                 | x         | x         |
| 15. | Engine utilization – medium                                 | h                 | x         | x         |
| 16. | Engine utilization – high                                   | h                 | x         | x         |
| 17. | Last level of soot in the filter                            | -                 | x         | x         |
| 18. | Work time composition – gripping                            | h                 | x         | -         |
| 19. | Work time composition –processing                           | h                 | x         | -         |
| 20. | Work time composition – other                               | h                 | x         | -         |
| 21. | Engine fuel usage – key-on                                  | l                 | x         | x         |
| 22. | Engine fuel usage – idle                                    | l                 | x         | x         |
| 23. | Engine fuel usage – low                                     | l                 | x         | x         |
| 24. | Engine fuel usage – medium                                  | l                 | x         | x         |
| 25. | Engine fuel usage – high                                    | l                 | x         | x         |
| 26. | DEF fluid level                                             | %                 | x         | x         |
| 27. | Fuel consumption composition – gripping                     | l                 | x         | -         |
| 28. | Fuel consumption composition – processing                   | l                 | x         | -         |
| 29. | Fuel consumption composition – other                        | l                 | x         | -         |
| 30. | Interrupted filter cleaning                                 | count             | x         | x         |
| 31. | Machine utilization – engine-off                            | h                 | x         | x         |
| 32. | Machine utilization – idle low revolutions                  | h                 | x         | -         |
| 33. | Machine utilization – idle high revolutions                 | h                 | x         | -         |
| 34. | Machine utilization – work low revolutions                  | h                 | x         | -         |
| 35. | Machine utilization – work high revolutions                 | h                 | x         | -         |
| 36. | Time with soot level – low level (0)                        | h                 | x         | x         |
| 37. | Time with soot level – low level (1)                        | h                 | x         | x         |
| 38. | Time with soot level – medium level (2)                     | h                 | x         | x         |
| 39. | Time with soot level – high level (3)                       | h                 | x         | x         |
| 40. | Time with soot level – very high level (4)                  | h                 | x         | x         |
| 41. | Time with soot level – separator operation                  | h                 | x         | x         |
| 42. | Productivity                                                | m <sup>3</sup> /h | x         | -         |
| 43. | Number of trees cut - standard                              |                   | x         | -         |
| 44. | Number of trees cut – multi-tree-handling                   |                   | x         | -         |
| 45. | Number of trees cut - fuelwood                              |                   | x         | -         |
| 46. | Maximum hydraulic oil temperature                           | °C                | x         | x         |
| 47. | Mileage                                                     | m                 | x         | x         |

|     |                                                    |                |   |   |
|-----|----------------------------------------------------|----------------|---|---|
| 48. | Average fuel consumption                           | l/h            | x | x |
| 49. | Completed filter cleaning                          | count          | x | x |
| 50. | Average tree volume - standard                     | m <sup>3</sup> | x | - |
| 51. | Number of grips - unloading                        |                | - | x |
| 52. | Number of grips - loading                          |                | - | x |
| 53. | Fuel consumption composition – driving empty       | l              | - | x |
| 54. | Fuel consumption composition – loading             | l              | - | x |
| 55. | Fuel consumption composition – driving loaded      | l              | - | x |
| 56. | Fuel consumption composition – unloading           | l              | - | x |
| 57. | Fuel consumption composition – driving on the road | l              | - | x |
| 58. | Average cycle time - unloading                     | sec.           | - | x |
| 59. | Average cycle time - loading                       | sec.           | - | x |
| 60. | Work time composition – driving empty              | h              | - | x |
| 61. | Work time composition – loading                    | h              | - | x |
| 62. | Work time composition – driving loaded             | h              | - | x |
| 63. | Work time composition – unloading                  | h              | - | x |
| 64. | Work time composition – driving on the road        | h              | - | x |
| 65. | Machine utilization – driving                      | h              | - | x |
| 66. | Machine utilization – crane work                   | h              | - | x |
| 67. | Machine utilization – driving and crane            | h              | - | x |
| 68. | Machine utilization – idle                         | h              | - | x |
